# Supplementary material for: Involving men to improve maternal and newborn health: A systematic review of the effectiveness of interventions
Source: PubMed Central journal article supplement (PMC5784936; doi:10.1371/journal.pone.0191620), 2018-01-25
Supplement: pone.0191620.s001.pdf [file pone.0191620.s001.pdf]

| Study                                                                                                                | Study design <sup>38</sup>   | Description of intervention                                                                                                           | Setting                       | Years        | Study population                                                                                                            | Number of participants                                                                         | EPHPP quality assessment |
|----------------------------------------------------------------------------------------------------------------------|------------------------------|---------------------------------------------------------------------------------------------------------------------------------------|-------------------------------|--------------|-----------------------------------------------------------------------------------------------------------------------------|------------------------------------------------------------------------------------------------|--------------------------|
| Studies designed to assess the effect of a male involvement intervention                                             |                              |                                                                                                                                       |                               |              |                                                                                                                             |                                                                                                |                          |
| Kunene 2005                                                                                                          | Cluster RCT                  | Facility-based couples' education at antenatal clinics                                                                                | South Africa, rural and urban | 2000-2003    | Women who were pregnant (10–30 weeks' gestation) and in a relationship, and their male partners                             | Women<br>Intervention n=729<br>Control n=694<br><br>Men<br>Intervention n=608<br>Control n=558 | Moderate                 |
| Midhet 2010                                                                                                          | Cluster RCT                  | Community-based education for men and women; training of traditional birth attendants; and community mobilisation to improve referral | Pakistan, rural               | 1998-2002    | Ever-married women aged <50 years who had been pregnant in the previous 12 months                                           | Intervention n=703<br>Comparison n=836<br>Control n=1022                                       | Moderate                 |
| Mullany 2007                                                                                                         | RCT                          | Facility-based couples' education at antenatal clinics at a tertiary hospital                                                         | Nepal, urban                  | 2003-2004    | Women who were pregnant (16–28 weeks' gestation), currently married, and whose husbands were present at the health facility | Intervention n=145<br>Comparison n=148<br>Control n=149                                        | Moderate                 |
| Sahip 2007                                                                                                           | Cohort analytic              | Workplace-based education for expectant fathers                                                                                       | Turkey, urban                 | Not reported | Expectant fathers                                                                                                           | Intervention n=80<br>Control n=80                                                              | Moderate                 |
| Varkey 2004                                                                                                          | Non-equivalent control group | Facility-based education for men and women individually or as a couple at antenatal clinics                                           | India, urban                  | 2001-2002    | Women who were pregnant (10–26 weeks' gestation) and in a relationship, and their male partners                             | Women<br>Intervention n=327<br>Control n=302<br><br>Men<br>Intervention n=327<br>Control n=302 | Moderate                 |
| Studies designed to assess the effect of multiple intervention components, including a male involvement intervention |                              |                                                                                                                                       |                               |              |                                                                                                                             |                                                                                                |                          |
| Fullerton 2005                                                                                                       | Repeat cross-sectional       | Family and community education (home visits and group discussions)                                                                    | India, rural                  | 1998-2001    | Women who had participated in intervention activities and given birth during the intervention (previous 30–42 months)       | Baseline n=600<br>Post-intervention n=833                                                      | Weak                     |
| Hossain 2006                                                                                                         | Quasi-experimental           | Family and community education (home visits and group discussions) and improved community-facility                                    | Bangladesh, rural             | 1999-2001    | Not reported                                                                                                                | Not reported                                                                                   | Weak                     |

| Study                | Study design <sup>38</sup>                              | Description of intervention                                                                                | Setting                      | Years     | Study population                                                                                  | Number of participants                                                                                     | EPHPP quality assessment |
|----------------------|---------------------------------------------------------|------------------------------------------------------------------------------------------------------------|------------------------------|-----------|---------------------------------------------------------------------------------------------------|------------------------------------------------------------------------------------------------------------|--------------------------|
|                      |                                                         | linkages                                                                                                   |                              |           |                                                                                                   |                                                                                                            |                          |
| Mushi 2010           | Before-and-after                                        | Family and community education (home visits and group discussions)                                         | Tanzania, rural              | 2004-2006 | Women who were pregnant, lactating, or already had a child and their male partners                | Women<br>Baseline n=138<br>Post-intervention n=173<br><br>Men<br>Baseline n=100<br>Post-intervention n=69  | Weak                     |
| Purdin 2009          | Program evaluation using health information system data | Primary healthcare program that included outreach to male partners and community leaders                   | Pakistan, rural refugee camp | 1996-2008 | Woman who had been pregnant or given birth during the intervention                                | Not reported                                                                                               | Weak                     |
| Sinha 2008           | Before-and-after                                        | Family and community education (home visits and public meetings), and improved community-facility linkages | India, rural                 | 2004-2006 | Women who had given birth in the previous 12 months                                               | Baseline n=319<br>Post-intervention n=501                                                                  | Weak                     |
| Sood 2004, Indonesia | Before-and-after with control at endline                | Social mobilisation campaign targeting husbands, midwives, and other community members                     | Indonesia, rural and urban   | 1999-2003 | Women who had had a live birth in the previous 15 months, and their male partners                 | Women<br>Intervention n=1,024<br>Control n=758<br><br>Men<br>Intervention n=300<br>Control n=283           | Weak                     |
| Sood 2004, Nepal     | Before-and-after                                        | Social mobilisation campaign targeting husbands and mothers-in-law                                         | Nepal, rural                 | 2000-2003 | Women who were pregnant or had had a live birth in the previous 3 months, and their male partners | Women<br>Baseline n=390<br>Post-intervention n=424<br><br>Men<br>Baseline n=236<br>Post-intervention n=246 | Weak                     |
| Turan 2011           | Before-and-after                                        | Community education and training of health care providers                                                  | Eritrea, rural               | 2005-2007 | Women who had given birth in the previous 12 months                                               | Baseline n=216<br>Post-intervention n=129                                                                  | Weak                     |
