# Supplementary material for: Involving men to improve maternal and newborn health: A systematic review of the effectiveness of interventions
Source: PubMed Central journal article supplement (PMC5784936; doi:10.1371/journal.pone.0191620), 2018-01-25
Supplement: pone.0191620.s002.pdf [file pone.0191620.s002.pdf]

| Study                                                                                                                | Antenatal care attendance                                                                                                                                                                                                                                                    | Birth with a skilled attendant                                                                                              | Facility birth                                                                                                                                                                                                                                                                                                                                                                                                                              | Postnatal care for women                                                                                                                                               |
|----------------------------------------------------------------------------------------------------------------------|------------------------------------------------------------------------------------------------------------------------------------------------------------------------------------------------------------------------------------------------------------------------------|-----------------------------------------------------------------------------------------------------------------------------|---------------------------------------------------------------------------------------------------------------------------------------------------------------------------------------------------------------------------------------------------------------------------------------------------------------------------------------------------------------------------------------------------------------------------------------------|------------------------------------------------------------------------------------------------------------------------------------------------------------------------|
| Studies designed to assess the effect of a male involvement intervention                                             |                                                                                                                                                                                                                                                                              |                                                                                                                             |                                                                                                                                                                                                                                                                                                                                                                                                                                             |                                                                                                                                                                        |
| Kunene 2005                                                                                                          | -                                                                                                                                                                                                                                                                            | -                                                                                                                           | -                                                                                                                                                                                                                                                                                                                                                                                                                                           | -                                                                                                                                                                      |
| Midhet 2010                                                                                                          | Significant increase in women receiving routine antenatal care compared with control in both the intervention arm (AOR 2.9, 95% CI 1.6–5.0) and the comparison arm (AOR 2.4, 95% CI 1.4–4.3), but no significant difference between intervention and comparison ( $p>0.05$ ) | -                                                                                                                           | No significant difference in women delivering in the district hospital compared with control in either the intervention arm (AOR 1.3, 95% CI 0.6–2.5) or the comparison arm (AOR 1.3, 95% CI 0.7–2.5), and no observed difference between intervention and comparison (no significance reported). No significant difference in women delivering in any other health facility (control 0.9%, intervention 1.9%, comparison 1.6%, $p>0.05$ ). | No significant difference in women's care-seeking at the district hospital during the postpartum period (control 5.1%, intervention 8.9%, comparison 10.4%, $p>0.05$ ) |
| Mullany 2007                                                                                                         | No significant difference in $\geq 4$ ANC visits between intervention and comparison (RR 1.06, 95% CI 0.95–1.18)                                                                                                                                                             | No significant difference in attendance by skilled provider between intervention and comparison (RR 1.00, 95% CI 0.93–1.09) | No significant difference in women delivering in a health institution between intervention and comparison (RR 0.98, 95% CI 0.91–1.05)                                                                                                                                                                                                                                                                                                       | Significant increase in postpartum visit within 2 weeks from birth between intervention and comparison (RR 1.25, 95% CI 1.01–1.54)                                     |
| Sahip 2007                                                                                                           | -                                                                                                                                                                                                                                                                            | -                                                                                                                           | -                                                                                                                                                                                                                                                                                                                                                                                                                                           | No significant difference in postpartum check-ups between intervention and control (OR 1.57, 95% CI 0.68–3.63)                                                         |
| Varkey 2004                                                                                                          | -                                                                                                                                                                                                                                                                            | -                                                                                                                           | -                                                                                                                                                                                                                                                                                                                                                                                                                                           | -                                                                                                                                                                      |
| Studies designed to assess the effect of multiple intervention components, including a male involvement intervention |                                                                                                                                                                                                                                                                              |                                                                                                                             |                                                                                                                                                                                                                                                                                                                                                                                                                                             |                                                                                                                                                                        |
| Fullerton 2005                                                                                                       | -                                                                                                                                                                                                                                                                            | -                                                                                                                           | -                                                                                                                                                                                                                                                                                                                                                                                                                                           | -                                                                                                                                                                      |
| Hossain 2006                                                                                                         | -                                                                                                                                                                                                                                                                            | Significant increase in met need for emergency obstetric care (baseline 16.0%, post-intervention 39.8%, $p<0.01$ )          | Significant increase in facility births (baseline 2.4%, post-intervention 20.5%, $p<0.01$ )                                                                                                                                                                                                                                                                                                                                                 | -                                                                                                                                                                      |
| Mushi 2010                                                                                                           | No significant difference in $\geq 4$ ANC visits among primigravida women (baseline 42.2%, post-intervention 51.3%, $p>0.05$ )                                                                                                                                               | Significant increase in birth with a skilled attendant (baseline 34.1%, post-intervention 51.4%, $p<0.05$ )                 | Observed increase in institutional deliveries (baseline 33.3%, post-intervention 49.8%, no significance reported)                                                                                                                                                                                                                                                                                                                           | -                                                                                                                                                                      |
| Purdin 2009                                                                                                          | Observed increase in $\geq 3$ ANC visits (baseline 49%, post-intervention 90%, no significance reported)                                                                                                                                                                     | -                                                                                                                           | Observed increase in births in an emergency obstetric care facility (baseline 4.8%, post-intervention 67.2%, no significance reported)                                                                                                                                                                                                                                                                                                      | Observed increase in postnatal care within 72 hours from birth (baseline 27.2%, post-intervention 84.5%, no significance reported)                                     |
| Sinha 2008                                                                                                           | Significant increase in $\geq 4$ ANC visits (baseline 61%, post-intervention 72.5%, $p<0.001$ )                                                                                                                                                                              | -                                                                                                                           | Significant decrease in home births (baseline 54.1%, post-intervention 38.4%, $p<0.001$ )                                                                                                                                                                                                                                                                                                                                                   | -                                                                                                                                                                      |
| Sood 2004, Indonesia                                                                                                 | Significant increase in $\geq 4$ ANC visits (control 83.8%, intervention 94.4%, $p\leq 0.00$ )                                                                                                                                                                               | Significant increase in birth attendance by skilled provider (control 44.2%, intervention 69.8%, $p\leq 0.00$ )             | Significant decrease in home births (control 5.7%, intervention 11.4%, $p\leq 0.00$ )                                                                                                                                                                                                                                                                                                                                                       | -                                                                                                                                                                      |
| Sood 2004, Nepal                                                                                                     | No observed difference in $\geq 4$ ANC visits (control 75.1%, intervention 75.4%, no                                                                                                                                                                                         | Observed decrease in birth attendance by doctors (control 42.0%, intervention                                               | Observed increase in home births (control 58.0%, intervention 70.7%, no                                                                                                                                                                                                                                                                                                                                                                     | -                                                                                                                                                                      |

|            |                                                                           |                                                                                                                                                                                                                                                          |                                                                                                                                |   |
|------------|---------------------------------------------------------------------------|----------------------------------------------------------------------------------------------------------------------------------------------------------------------------------------------------------------------------------------------------------|--------------------------------------------------------------------------------------------------------------------------------|---|
|            | significance reported)                                                    | 29.3%, no significance reported). No observed difference in birth attendance by nurses (control 0.0%, intervention 0.0%). Observed increase in birth attendance at home by skilled provider (control 0.0%, intervention 4.0%, no significance reported). | significance reported). Observed decrease in births in hospital (control 42.0%, intervention 29.3%, no significance reported). |   |
| Turan 2011 | Significant increase in $\geq 4$ ANC visits (OR 17.09, 95% CI 9.85–29.66) | -                                                                                                                                                                                                                                                        | Significant increase in births at a health facility (OR 26.24, 95% CI 11.42–60.27)                                             | - |
