# Supplementary material for: Involving men to improve maternal and newborn health: A systematic review of the effectiveness of interventions
Source: PubMed Central journal article supplement (PMC5784936; doi:10.1371/journal.pone.0191620), 2018-01-25
Supplement: pone.0191620.s003.pdf [file pone.0191620.s003.pdf]

| Study                                                                                                                | Birth preparedness and complications readiness                                                                                                                                                                                                                  | Maternal nutrition                                                                                                                                                                                                                                                                                                                                                                                                                                                                                                                                                           | Newborn nutrition and breastfeeding                                                                                                                                                                                                                                                                                                                                                                                                 |
|----------------------------------------------------------------------------------------------------------------------|-----------------------------------------------------------------------------------------------------------------------------------------------------------------------------------------------------------------------------------------------------------------|------------------------------------------------------------------------------------------------------------------------------------------------------------------------------------------------------------------------------------------------------------------------------------------------------------------------------------------------------------------------------------------------------------------------------------------------------------------------------------------------------------------------------------------------------------------------------|-------------------------------------------------------------------------------------------------------------------------------------------------------------------------------------------------------------------------------------------------------------------------------------------------------------------------------------------------------------------------------------------------------------------------------------|
| Studies designed to assess the effect of a male involvement intervention                                             |                                                                                                                                                                                                                                                                 |                                                                                                                                                                                                                                                                                                                                                                                                                                                                                                                                                                              |                                                                                                                                                                                                                                                                                                                                                                                                                                     |
| Kunene 2005                                                                                                          | -                                                                                                                                                                                                                                                               | -                                                                                                                                                                                                                                                                                                                                                                                                                                                                                                                                                                            | Observed increase in breastfeeding initiation both immediately (control 63%, intervention 66%, no significance reported) and within one hour from birth (control 16%, intervention 17%, no significance reported). Observed decrease in commencing mixed feeding before 2 months (control 34%, intervention 30%, no significance reported).                                                                                         |
| Midhet 2010                                                                                                          | -                                                                                                                                                                                                                                                               | No significant difference in women taking iron-folic acid tablets compared with control in either the intervention arm (AOR 1.2, 95% CI 0.8–1.8) or the comparison arm (AOR 1.1, 95% CI 0.9–1.5), no significance reported for difference between intervention and comparison. Significant increase in women improving diet in pregnancy compared with control in the intervention arm (AOR 1.2, 95% CI 1.0–1.6) but no significant difference in the comparison arm (AOR 1.2, 95% CI 0.9–1.5), no significance reported for difference between intervention and comparison. | -                                                                                                                                                                                                                                                                                                                                                                                                                                   |
| Mullany 2007                                                                                                         | No significant difference in making $\geq 4$ birth preparations (purchase safe delivery kit, save money for delivery, arrange blood donor, arrange transport for delivery, make emergency plan) between intervention and comparison (RR 1.30, 95% CI 0.78–2.15) | -                                                                                                                                                                                                                                                                                                                                                                                                                                                                                                                                                                            | -                                                                                                                                                                                                                                                                                                                                                                                                                                   |
| Sahip 2007                                                                                                           | Significant increase in fathers making birth preparations (OR 24.30, 95% CI 10.62–55.60, $p < 0.01$ )                                                                                                                                                           | -                                                                                                                                                                                                                                                                                                                                                                                                                                                                                                                                                                            | Significant increase in breastfeeding initiation within 1 hour from birth (OR 2.38, 95% CI 1.24–4.61, $p < 0.01$ ). Significant increase in exclusive breastfeeding to 3 months (OR 3.44, 95% CI 1.74–6.82, $p < 0.01$ ). Significant decrease in supplementary feeding before 6 months (OR 0.19, 0.09–0.37, $p < 0.01$ ). Significant increase in breastfeeding continuation to 9 months (OR 2.64, 95% CI 1.36–5.09, $p < 0.01$ ). |
| Varkey 2004                                                                                                          | -                                                                                                                                                                                                                                                               | -                                                                                                                                                                                                                                                                                                                                                                                                                                                                                                                                                                            | No difference in whether baby was ever breastfed (control 99.6%, intervention 100.0%, $p > 0.05$ ). Significant increase in breastfeeding initiation within 1 hour from birth (control 47.3%, intervention 63.1%, $p < 0.05$ ). Significant decrease in exclusive breastfeeding to 6 months (control 62.0%, intervention 49.3%, $p < 0.05$ ).                                                                                       |
| Studies designed to assess the effect of multiple intervention components, including a male involvement intervention |                                                                                                                                                                                                                                                                 |                                                                                                                                                                                                                                                                                                                                                                                                                                                                                                                                                                              |                                                                                                                                                                                                                                                                                                                                                                                                                                     |
| Fullerton 2005                                                                                                       | Significant increase in women making $\geq 1$ birth preparations (save money, arrange transport for delivery,                                                                                                                                                   | Significant increase in women taking iron-folic acid tablets or syrup (baseline 0.9%, post-intervention                                                                                                                                                                                                                                                                                                                                                                                                                                                                      | Significant increase in breastfeeding initiation within 1 hour from birth (baseline 1.7%, post-intervention 76.2%,                                                                                                                                                                                                                                                                                                                  |

|                      |                                                                                                                                                                                                                                                                                                                                                                                                                                                                                                                                                                                                                                                                                                                                                                                                                                                                                                                                                                                    |                                                                                                                                                                                                                                                                                                                                                                                                                                                                                                     |          |
|----------------------|------------------------------------------------------------------------------------------------------------------------------------------------------------------------------------------------------------------------------------------------------------------------------------------------------------------------------------------------------------------------------------------------------------------------------------------------------------------------------------------------------------------------------------------------------------------------------------------------------------------------------------------------------------------------------------------------------------------------------------------------------------------------------------------------------------------------------------------------------------------------------------------------------------------------------------------------------------------------------------|-----------------------------------------------------------------------------------------------------------------------------------------------------------------------------------------------------------------------------------------------------------------------------------------------------------------------------------------------------------------------------------------------------------------------------------------------------------------------------------------------------|----------|
|                      | identify referral site) (baseline 0.15%, post-intervention 82.4%, p<0.001)                                                                                                                                                                                                                                                                                                                                                                                                                                                                                                                                                                                                                                                                                                                                                                                                                                                                                                         | 35.8%, p<0.001)                                                                                                                                                                                                                                                                                                                                                                                                                                                                                     | p<0.001) |
| Hossain 2006         | Observed increase in women knowing ≥4 obstetric danger signs when prompted (intervention 45%, comparison 4%, no significance reported)                                                                                                                                                                                                                                                                                                                                                                                                                                                                                                                                                                                                                                                                                                                                                                                                                                             | -                                                                                                                                                                                                                                                                                                                                                                                                                                                                                                   | -        |
| Mushi 2010           | Observed increase in women and men able to identify 3 danger signs during pregnancy (baseline 52.9%, post-intervention 56.2%, no significance reported) and able to mention 3 complications during delivery (baseline 44.9%, post-intervention 52.9%, no significance reported).<br>Observed increase in women and men able to identify ≥3 practices that contribute to delay in seeking care (baseline 46.6%, post-intervention 55.9%, no significance reported).                                                                                                                                                                                                                                                                                                                                                                                                                                                                                                                 | -                                                                                                                                                                                                                                                                                                                                                                                                                                                                                                   | -        |
| Purdin 2009          | -                                                                                                                                                                                                                                                                                                                                                                                                                                                                                                                                                                                                                                                                                                                                                                                                                                                                                                                                                                                  | -                                                                                                                                                                                                                                                                                                                                                                                                                                                                                                   | -        |
| Sinha 2008           | Significant increase in women saving money to meet delivery expenses (baseline 43.3%, post-intervention 67.7%, p≤0.001) and identifying or deciding transport for delivery (baseline 28.0%, post-intervention 52.1%, p≤0.001). Significant increase in women identifying a hospital/facility for delivery (baseline 40.2%, post-intervention 65.3%, p≤0.001) or in case of emergency (baseline 35.0%, post-intervention 49.4%, p≤0.001). Observed decrease in women identifying a birth attendant (baseline 44.5%, post-intervention 35.5%, no significance reported).                                                                                                                                                                                                                                                                                                                                                                                                             | Significant increase in women consuming additional nutritious foods during pregnancy: green leafy vegetables (baseline 33.5%, post-intervention 65.5%, p≤0.001); milk (baseline 27.0%, post-intervention 33.9%, p≤0.001); lentils (baseline 20.1%, post-intervention 31.1%, p≤0.001); and eggs (baseline 15.4%, post-intervention 28.8%, p≤0.001). Significant increase in women receiving supplementary nutrition from the local health centre (baseline 45.1%, post-intervention 58.7%, p≤0.001). | -        |
| Sood 2004, Indonesia | Significant increase in knowledge of bleeding as a danger sign during pregnancy among both women (control 16.4%, intervention 40.7%, p≤0.00) and male partners (control 11.0%, intervention 31.7%, p≤0.00). Significant increase in knowledge of danger signs during childbirth: severe bleeding among both women (control 12.3%, intervention 30.8%, p≤0.00) and male partners (control 8.8%, intervention 20.3%, p≤0.00); prolonged labour among women (control 4.2%, intervention 8.5%, p≤0.00) but no significant difference among male partners (control 4.2%, intervention 7.0%, p>0.05); and retained placenta among women (control 2.2%, intervention 4.1%, p≤0.05) but no significant difference among male partners (control 1.8%, intervention 3.7%, p>0.05). Significant increase in knowledge of severe bleeding as a danger sign during postpartum period among both women (control 10.3%, intervention 29.2%, p≤0.00) and male partners (control 9.2%, intervention | -                                                                                                                                                                                                                                                                                                                                                                                                                                                                                                   | -        |

|                  |                                                                                                                                                                                                                                                                                                                                                                                                                                                                                                                                                                                                                                                                                                                                                                                                                                                                                                                                                                                                                                                                                                                                                                                                                                                                                                                                                                                                                                                                                                                                                                                                                                                                                                                                                                                                                                                                                                                                                                              |   |   |
|------------------|------------------------------------------------------------------------------------------------------------------------------------------------------------------------------------------------------------------------------------------------------------------------------------------------------------------------------------------------------------------------------------------------------------------------------------------------------------------------------------------------------------------------------------------------------------------------------------------------------------------------------------------------------------------------------------------------------------------------------------------------------------------------------------------------------------------------------------------------------------------------------------------------------------------------------------------------------------------------------------------------------------------------------------------------------------------------------------------------------------------------------------------------------------------------------------------------------------------------------------------------------------------------------------------------------------------------------------------------------------------------------------------------------------------------------------------------------------------------------------------------------------------------------------------------------------------------------------------------------------------------------------------------------------------------------------------------------------------------------------------------------------------------------------------------------------------------------------------------------------------------------------------------------------------------------------------------------------------------------|---|---|
|                  | 19.7%, $p \leq 0.00$ ), but no significant difference in knowledge of high fever as a danger sign during the postpartum period among either women (control 0.3%, intervention 0.9%, $p > 0.05$ ) or male partners (control 0.4%, intervention 1.3%, $p > 0.05$ ).                                                                                                                                                                                                                                                                                                                                                                                                                                                                                                                                                                                                                                                                                                                                                                                                                                                                                                                                                                                                                                                                                                                                                                                                                                                                                                                                                                                                                                                                                                                                                                                                                                                                                                            |   |   |
| Sood 2004, Nepal | Observed increase in knowledge of vaginal bleeding as a danger sign during pregnancy among both women (baseline 30.5%, post-intervention 50.9%, no significance reported) and male partners (baseline 28.0%, post-intervention 31.7%, no significance reported). Observed increase in knowledge of severe vaginal bleeding as a danger sign during childbirth among both women (baseline 23.6%, post-intervention 47.6%, no significance reported) and male partners (baseline 17.4%, post-intervention 26.0%, no significance reported), but no observed difference in knowledge of retained placenta as a danger sign during childbirth among either women (baseline 5.4%, post-intervention 5.9%, no significance reported) or male partners (baseline 3.0%, post-intervention 3.3%, no significance reported) and an observed decrease in knowledge of prolonged labour as a danger sign during childbirth among both women (baseline 72.8%, post-intervention 55.9%, no significance reported) and male partners (baseline 69.1%, post-intervention 48.4%, no significance reported). Observed decrease in knowledge of severe bleeding as a danger sign during postpartum period among women (baseline 61.8%, post-intervention 59.2%, no significance reported) but an observed increase among male partners (baseline 48.7%, post-intervention 48.8%, no significance reported). Observed increase in knowledge of high fever as a danger sign during the postpartum period among women (baseline 23.3%, post-intervention 28.1%, no significance reported) but an observed decrease among male partners (baseline 27.1%, post-intervention 21.5%, no significance reported). Observed increase in knowledge of fast breathing as a danger sign in newborns ( $\leq 4$ weeks after birth) among both women (baseline 45.4%, post-intervention 55.2%, no significance reported) and male partners (baseline 45.3%, post-intervention 48.8%, no significance reported) | - | - |
| Turan 2011       |                                                                                                                                                                                                                                                                                                                                                                                                                                                                                                                                                                                                                                                                                                                                                                                                                                                                                                                                                                                                                                                                                                                                                                                                                                                                                                                                                                                                                                                                                                                                                                                                                                                                                                                                                                                                                                                                                                                                                                              | - | - |
