# Supplementary material for: Involving men to improve maternal and newborn health: A systematic review of the effectiveness of interventions
Source: PubMed Central journal article supplement (PMC5784936; doi:10.1371/journal.pone.0191620), 2018-01-25
Supplement: pone.0191620.s004.pdf [file pone.0191620.s004.pdf]

| Study                                                                    | Maternal mortality | Maternal morbidity and maternal mental health                                                                                                                                                                                                                                                                                                                                                                                                                                                                                                                                                                                                                                                                                                                                                                                                                                                       | Stillbirths                                                                              | Perinatal mortality                                                                                                                                                                                                                                                              | Neonatal mortality                                                                                                                                                                                                                                                                                                                                                                                                                                                                                                                                   |
|--------------------------------------------------------------------------|--------------------|-----------------------------------------------------------------------------------------------------------------------------------------------------------------------------------------------------------------------------------------------------------------------------------------------------------------------------------------------------------------------------------------------------------------------------------------------------------------------------------------------------------------------------------------------------------------------------------------------------------------------------------------------------------------------------------------------------------------------------------------------------------------------------------------------------------------------------------------------------------------------------------------------------|------------------------------------------------------------------------------------------|----------------------------------------------------------------------------------------------------------------------------------------------------------------------------------------------------------------------------------------------------------------------------------|------------------------------------------------------------------------------------------------------------------------------------------------------------------------------------------------------------------------------------------------------------------------------------------------------------------------------------------------------------------------------------------------------------------------------------------------------------------------------------------------------------------------------------------------------|
| Studies designed to assess the effect of a male involvement intervention |                    |                                                                                                                                                                                                                                                                                                                                                                                                                                                                                                                                                                                                                                                                                                                                                                                                                                                                                                     |                                                                                          |                                                                                                                                                                                                                                                                                  |                                                                                                                                                                                                                                                                                                                                                                                                                                                                                                                                                      |
| Kunene 2005                                                              | -                  | -                                                                                                                                                                                                                                                                                                                                                                                                                                                                                                                                                                                                                                                                                                                                                                                                                                                                                                   | Observed decrease in stillbirths (control 4%, intervention 2%, no significance reported) | -                                                                                                                                                                                                                                                                                | Observed decrease in death within 7 days from birth (control 2%, intervention 1%, no significance reported). No observed difference in death between 7 days and 6 months from birth (control 3%, intervention 3%, no significance reported).                                                                                                                                                                                                                                                                                                         |
| Midhet 2010                                                              | -                  | No significant difference in illness during pregnancy compared with control in the intervention arm, but a significant decrease in the comparison arm (control 92.1%, intervention 90.7%, comparison 87.6%, $p < 0.05$ ), no significance reported for difference between intervention and comparison. No significant difference in illness during delivery compared with control in the intervention arm, but a significant decrease in the comparison arm (control 60.8%, intervention 60.7%, comparison 52.6%, $p < 0.05$ ), no significance reported for difference between intervention and comparison. No significant difference in illness immediately after delivery (control 45.1%, intervention 44.3%, comparison 40.2%, $p > 0.05$ ). No significant difference in illness during the postpartum period compared with control in the intervention arm, but a significant decrease in the | -                                                                                        | No significant difference in perinatal mortality compared with control in the intervention arm (AOR 1.4, 95% CI 0.9–2.2) but a significant decrease in the comparison arm (AOR 0.5, 95% CI 0.3–0.7), no significance reported for difference between intervention and comparison | No significant difference in death within 7 days from birth compared with control in either the intervention arm (AOR 0.7, 95% CI 0.3–1.7) or the comparison arm (AOR 0.6, 95% CI 0.4–1.0), no significance reported for difference between intervention and comparison. No significant difference in death within one month from birth compared with control in either the intervention arm (AOR 0.9, 95% CI 0.5–1.6) or the comparison arm (AOR 0.7, 95% CI 0.4–1.0), no significance reported for difference between intervention and comparison. |

|                                                                                                                      |                                                                                                                                                                    |                                                                                                                                                            |                                                                                                               |   |                                                                                                                                                                                                                                                                                  |
|----------------------------------------------------------------------------------------------------------------------|--------------------------------------------------------------------------------------------------------------------------------------------------------------------|------------------------------------------------------------------------------------------------------------------------------------------------------------|---------------------------------------------------------------------------------------------------------------|---|----------------------------------------------------------------------------------------------------------------------------------------------------------------------------------------------------------------------------------------------------------------------------------|
|                                                                                                                      |                                                                                                                                                                    | comparison arm (control 69.2%, intervention 62.8%, comparison 49.1%, p<0.05), no significance reported for difference between intervention and comparison. |                                                                                                               |   |                                                                                                                                                                                                                                                                                  |
| Mullany 2007                                                                                                         | -                                                                                                                                                                  | -                                                                                                                                                          | -                                                                                                             | - | -                                                                                                                                                                                                                                                                                |
| Sahip 2007                                                                                                           | -                                                                                                                                                                  | -                                                                                                                                                          | -                                                                                                             | - | -                                                                                                                                                                                                                                                                                |
| Varkey 2004                                                                                                          | -                                                                                                                                                                  | Significant decrease in complications in pregnancy or soon after delivery (control, 37.7% intervention, 23.2% p<0.05)                                      | No observed difference in stillbirths (control 2.0% (n=6), intervention 1.5% (n=5), no significance reported) | - | No observed difference in death within 7 days from birth (control 0.0% (n=0), intervention 0.6% (n=2), no significance reported). No observed difference in death between 7 days and 6 months from birth (control 2.0% (n=6), intervention 1.8% (n=6), no significance reported) |
| Studies designed to assess the effect of multiple intervention components, including a male involvement intervention |                                                                                                                                                                    |                                                                                                                                                            |                                                                                                               |   |                                                                                                                                                                                                                                                                                  |
| Fullerton 2005                                                                                                       | No significant difference in maternal deaths (baseline 1.5%, post-intervention 0.4% p=0.053)                                                                       | -                                                                                                                                                          | No significant difference in stillbirths (baseline 2.7%, post-intervention 4.4%, p=0.095)                     | - | No significant difference in neonatal mortality (baseline 4.2%, post-intervention 3.5%, p=0.559)                                                                                                                                                                                 |
| Hossain 2006                                                                                                         | -                                                                                                                                                                  | -                                                                                                                                                          | -                                                                                                             | - | -                                                                                                                                                                                                                                                                                |
| Mushi 2010                                                                                                           | -                                                                                                                                                                  | -                                                                                                                                                          | -                                                                                                             | - | -                                                                                                                                                                                                                                                                                |
| Purdin 2009                                                                                                          | Observed decrease in maternal mortality ratio during the intervention (291/100,000 live births in 2000, 102/100,000 live births in 2004, no significance reported) | -                                                                                                                                                          | -                                                                                                             | - | Observed decrease in neonatal mortality ratio during the intervention (25/1,000 live births in 2000, 20.7/1,000 live births in 2006, no significance reported)                                                                                                                   |
| Sinha 2008                                                                                                           | -                                                                                                                                                                  | -                                                                                                                                                          | -                                                                                                             | - | -                                                                                                                                                                                                                                                                                |
| Sood 2004, Indonesia                                                                                                 | -                                                                                                                                                                  | -                                                                                                                                                          | -                                                                                                             | - | -                                                                                                                                                                                                                                                                                |
| Sood 2004, Nepal                                                                                                     | -                                                                                                                                                                  | -                                                                                                                                                          | -                                                                                                             | - | -                                                                                                                                                                                                                                                                                |
| Turan 2011                                                                                                           | -                                                                                                                                                                  | Significant decrease in women or infants experiencing a problem during a recent birth (baseline 34%, post-intervention 13%, p<0.001)                       | -                                                                                                             | - | -                                                                                                                                                                                                                                                                                |
